# Supplementary material
Source: publisher site journal article supplement (https://www.dovepress.com/article/358476)
Supplement: Supplementary file 1 [file get_supplementary_file.php]

**Appendix 1: Detailed Search Strategy**

**For hypertension**-

*Databases searched:*

MEDLINE and Embase

*Limits used:*

2010 to 2021, English Language, Human Species, Region Argentina, Not Editorial/Letter to the Editor/Thesis Abstract, Full text available.

*Keywords used:*

hypertension OR blood pressure OR hypertensives AND

epidemiology OR prevalence OR incidence OR national OR survey OR registry AND

awareness OR knowledge OR health literacy OR screening OR diagnosis OR diagnosed OR undiagnosed OR treatment OR treated OR untreated OR control OR controlled OR uncontrolled OR adherence OR compliance OR adhere OR therapy OR non-adherence AND

Argentina

**For dyslipidemia**-

*Databases searched:*

MEDLINE and Embase

*Limits used:*

2010 to 2021, English Language, Human Species, Region Argentina, Not Editorial/Letter to the Editor/Thesis Abstract, Full text available.

*Keywords used:*

dyslipidemia OR hypercholesterolemia OR cholesterol OR triglycerides OR LDL AND

epidemiology OR prevalence OR incidence OR national OR survey OR registry OR Statistics AND

health literacy OR screening OR awareness OR knowledge OR treated OR treatment OR diagnosis OR undiagnosed OR diagnosed OR therapy OR controlled OR control OR uncontrolled OR adherence OR adhere OR compliance AND

Argentina OR Latin America

**Appendix 2: Definitions of patient journey stages used in the study**

Various stages of the patient journey were measured as:

1. Awareness was considered as self-reporting or any prior diagnosis.

2. Screening in the case of hypertension was the measurement of BP by a healthcare worker, and in the case of dyslipidemia, hypercholesterolemia was the measurement of total cholesterol levels only.

3. Diagnosis was measured as patients diagnosed with hypertension or dyslipidemia by a healthcare professional.

4. Treatment included the use of antihypertensives or lipid-lowering agents.

5. For adherence, self-reported adherence and/or compliance with the prescribed medication were considered.

6. Control was described as achievement and maintenance of therapeutic targets, in case of hypertension, as BP <= 140/90, and in case of dyslipidemia, total cholesterol as <=200 mg/dl.
